# Supplementary material for: Earthworms drastically change fungal and bacterial communities during vermicomposting of sewage sludge
Source: PubMed Central journal article supplement (PMC8324770; doi:10.1038/s41598-021-95099-z), 2021-07-30
Supplement: 41598_2021_95099_MOESM1_ESM.pdf [file 41598_2021_95099_MOESM1_ESM.pdf]

**Earthworms drastically change fungal and bacterial communities during vermicomposting of sewage sludge**

Jorge Domínguez, Manuel Aira, Keith A. Crandall, Marcos Pérez-Losada

**Supplementary Figures**

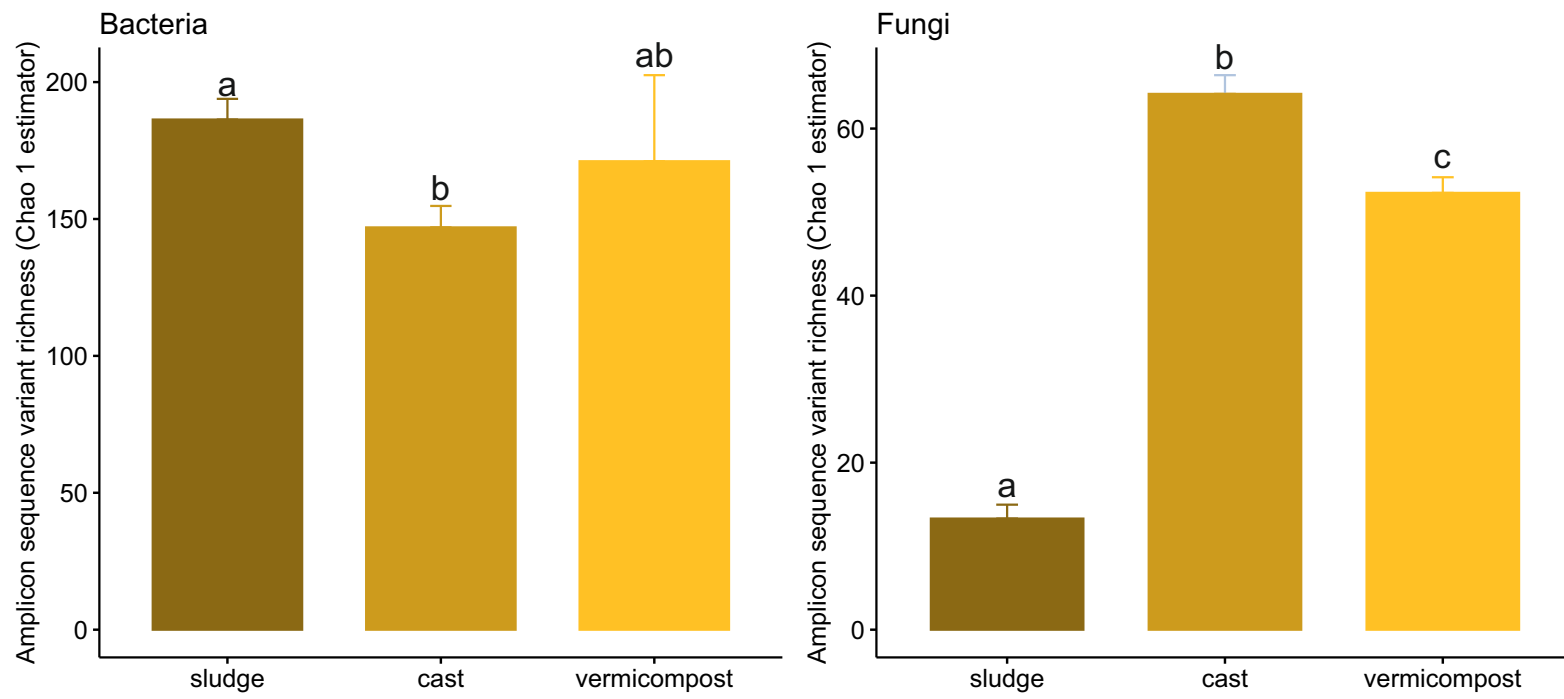

**Figure S1:** Changes in  $\alpha$ -diversity of bacterial and fungal communities during vermicomposting of sewage sludge denoted by Chao 1 richness estimator.

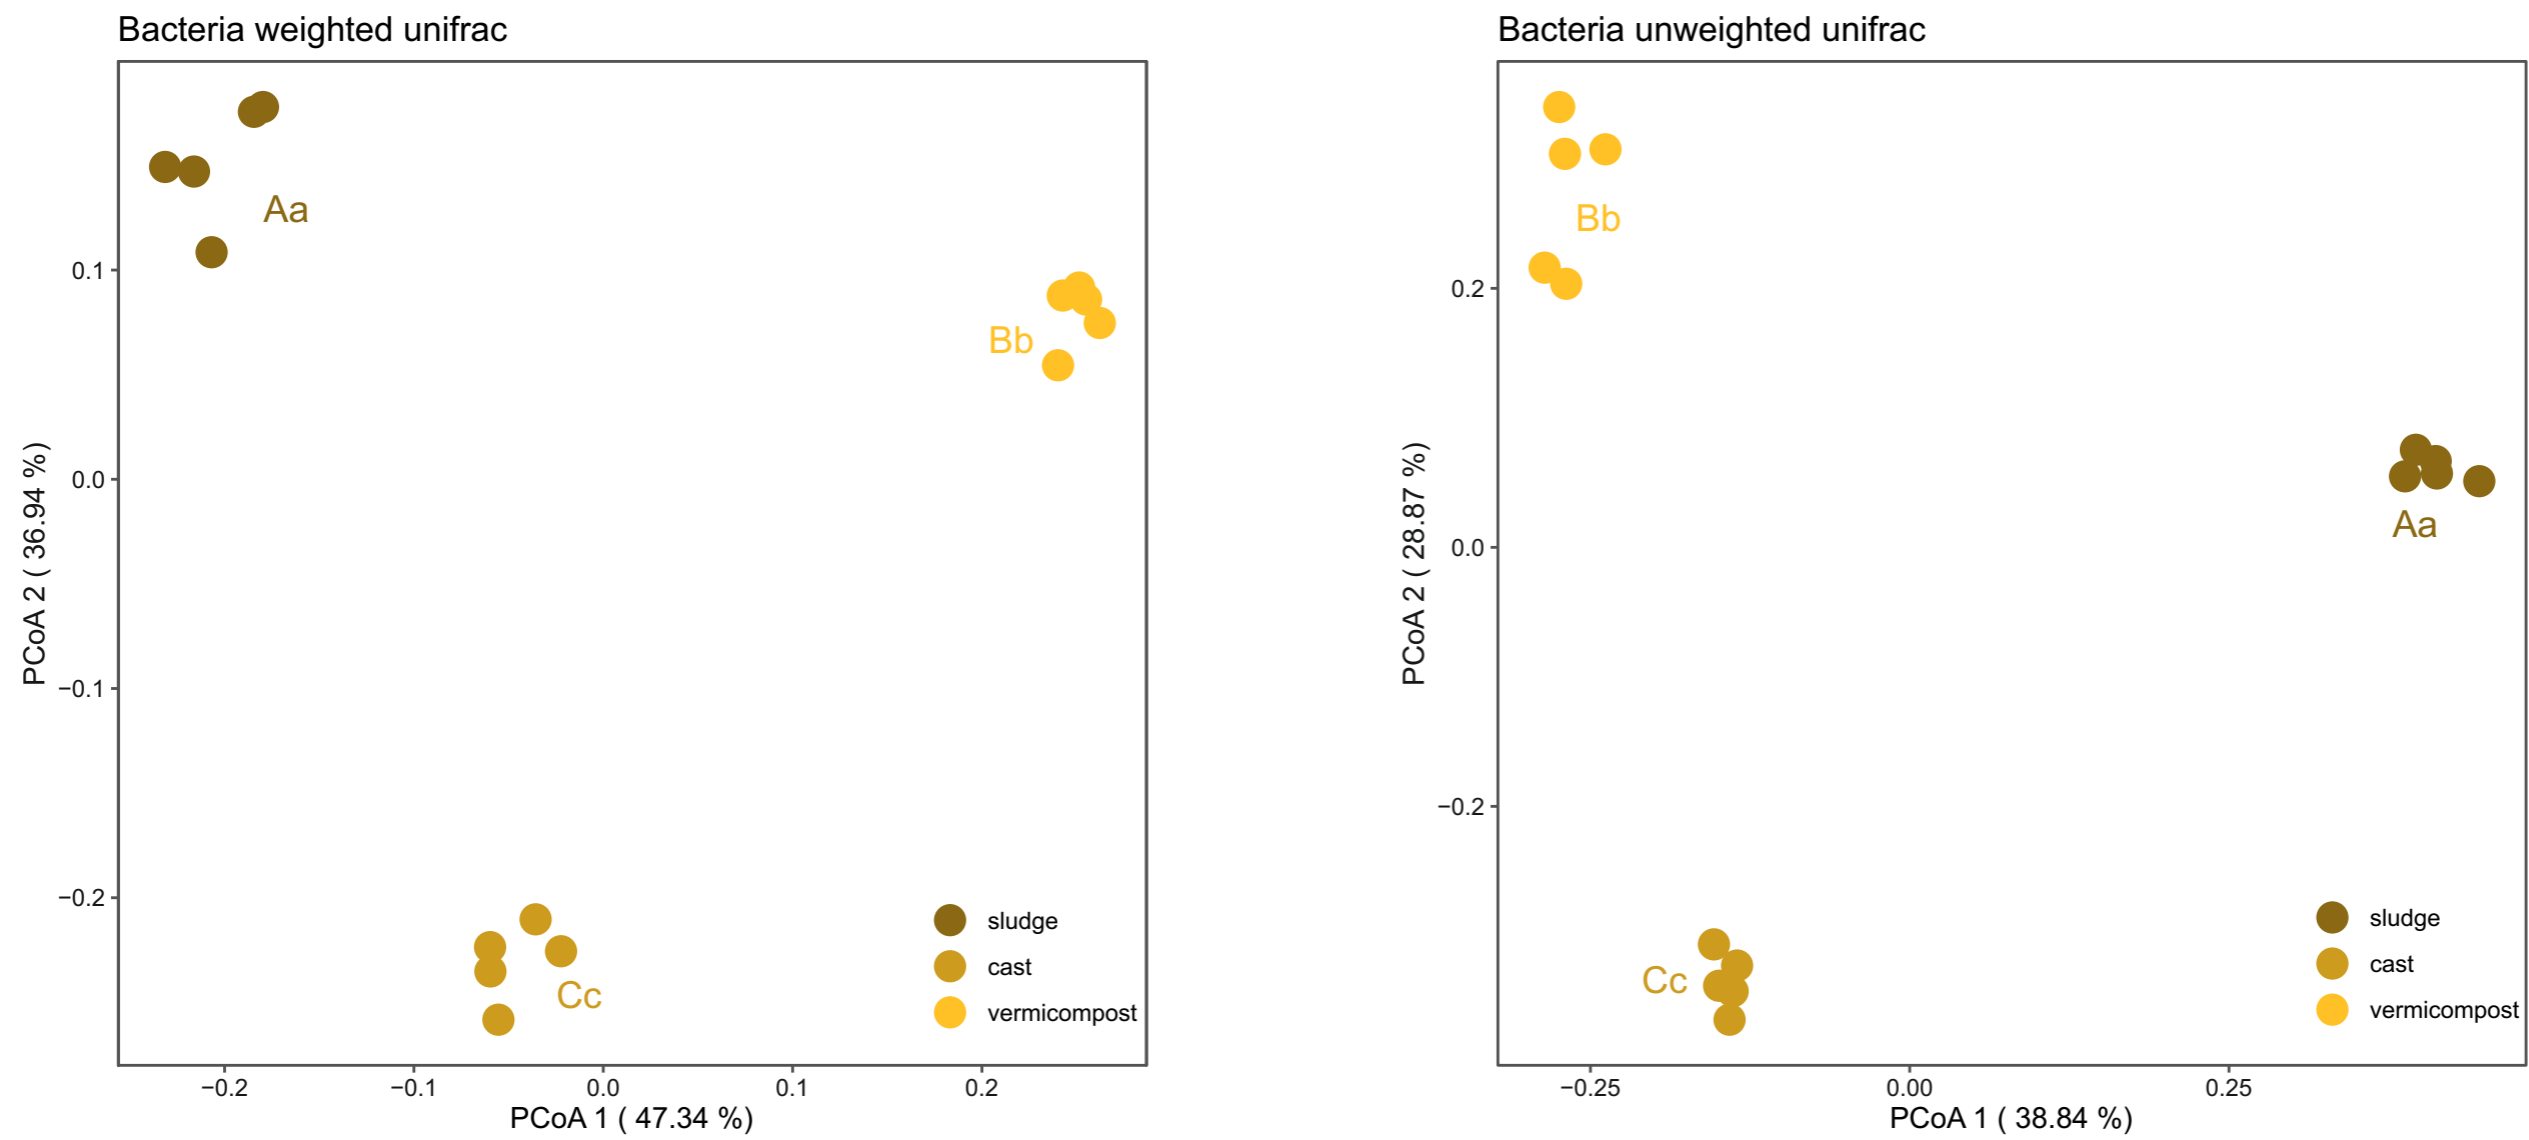

**Figure S2:** Changes in  $\beta$ -diversity of bacterial communities during vermicomposting of sewage sludge. Principal coordinate analysis with weighted and unweighted UniFrac distances. Different capital and lower-case letters indicate significant differences between sewage sludge, fresh earthworm casts and vermicompost in PCoA 1 and PCoA 2 scores respectively (paired Wilcoxon test, FDR corrected).

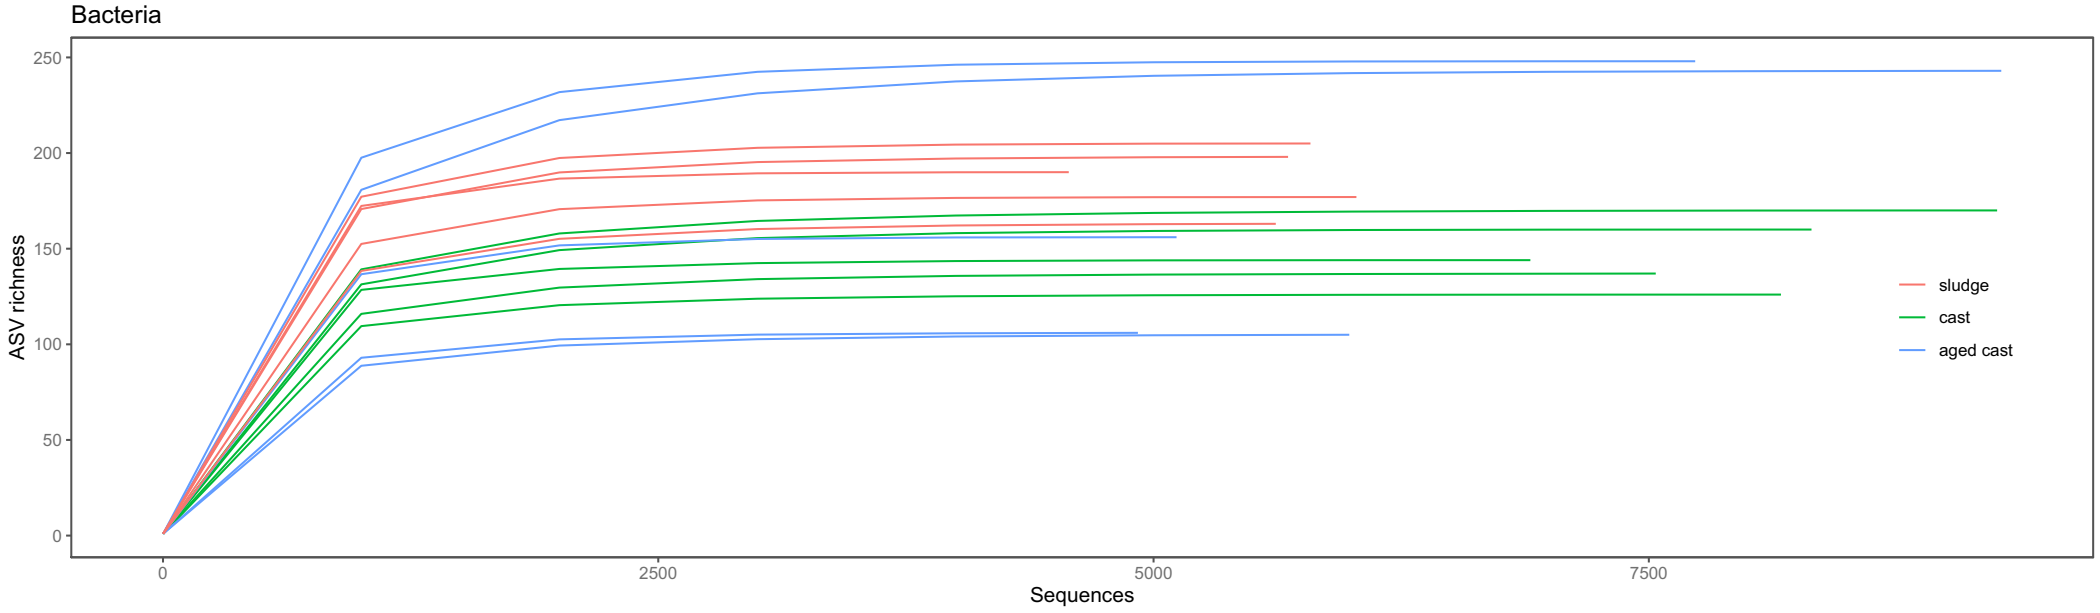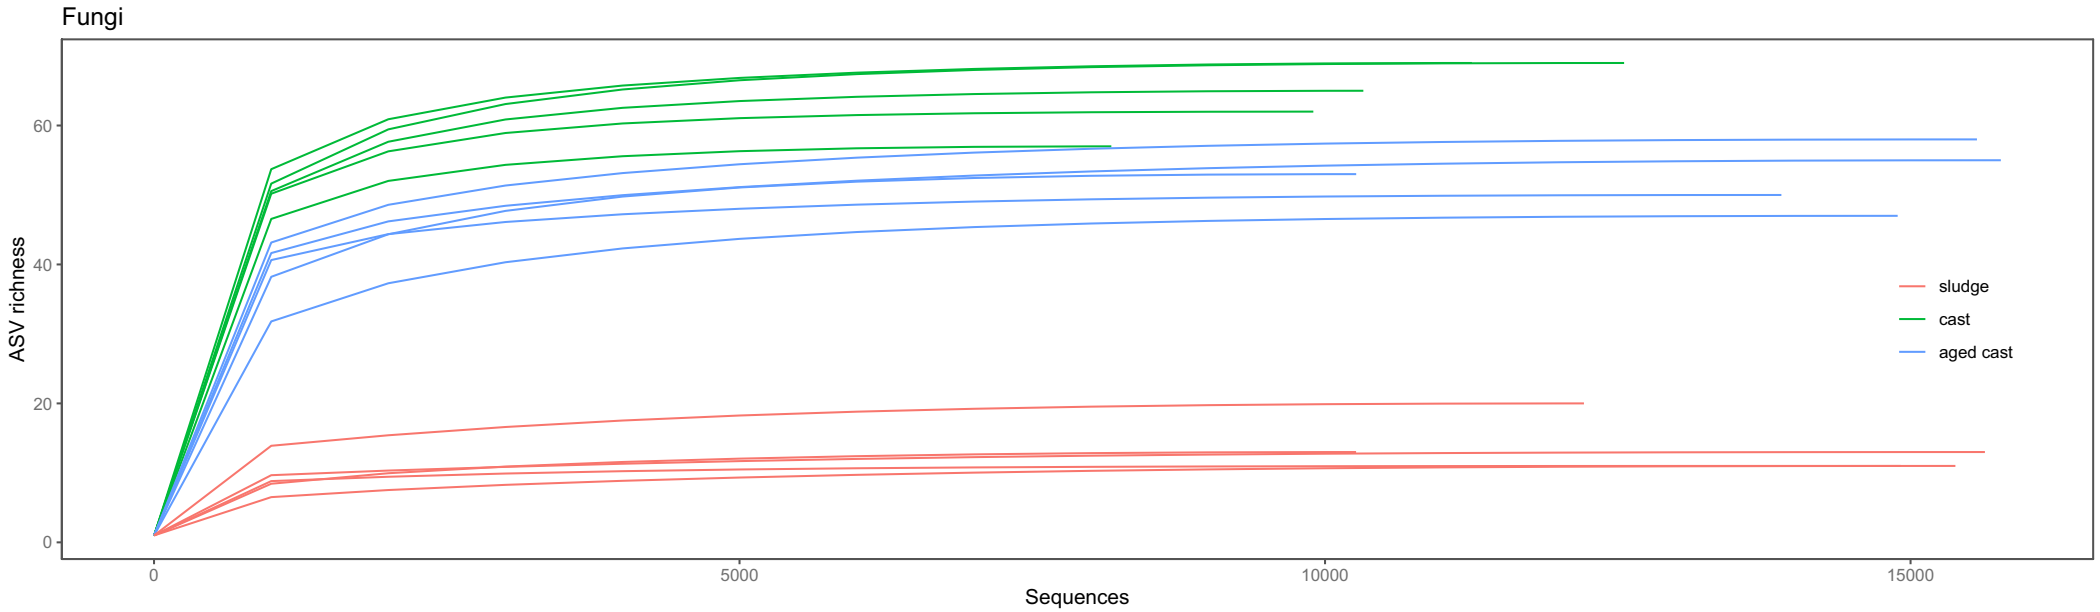

**Figure S3:** Rarefaction curves indicating the number of amplicon sequence variants (ASVs) of bacteria and fungi found in each sample of sewage sludge and earthworm casts and aged casts.



a)

GAP: Gut-associated processes  
CAP: Cast-associated processes

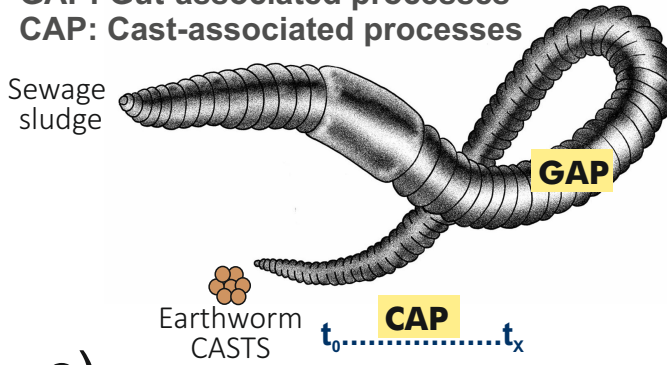

b)

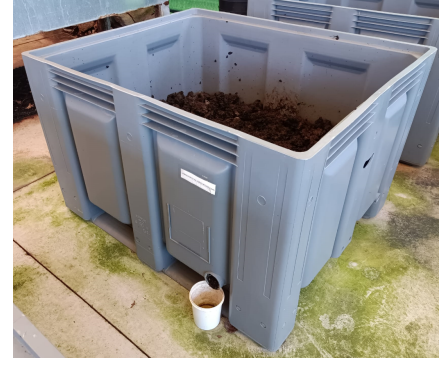

c)

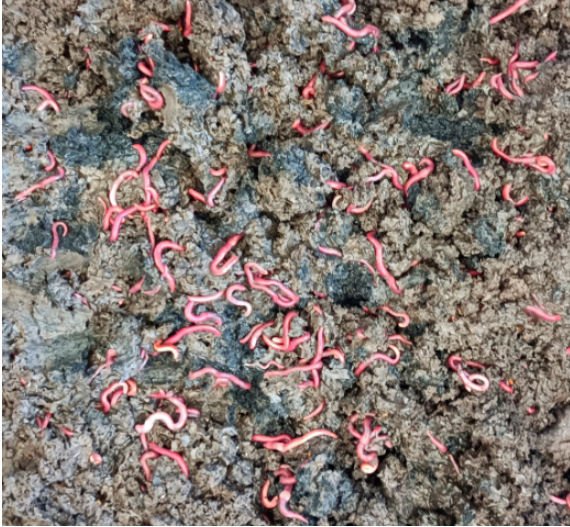

d)

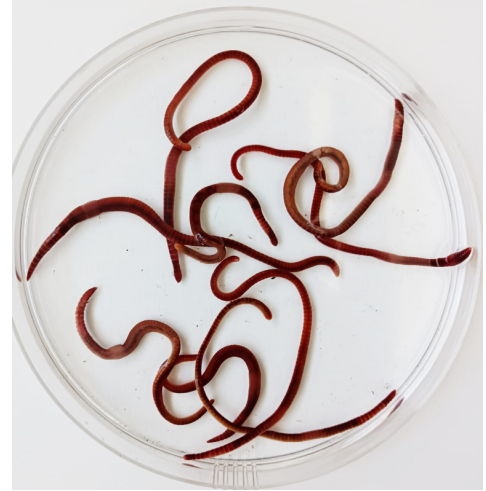

e)

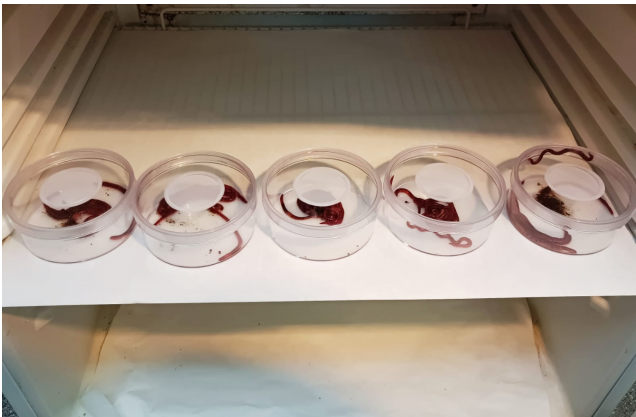

f)

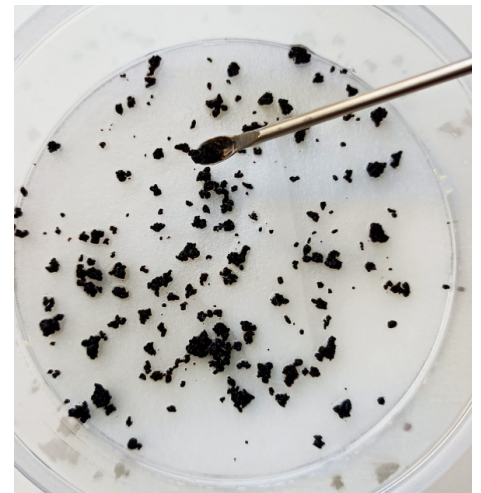

g)

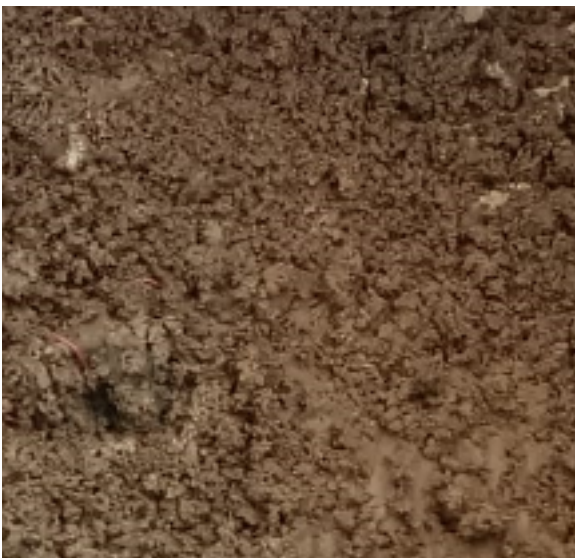

**Figure S4:** a) GAP and CAP processes during vermicomposting of sewage sludge. b) Rectangular plastic pilot-scale vermireactor (1.1 m long  $\times$  1.05 m wide  $\times$  70 cm high). c) Earthworms (*Eisenia andrei*) in the vermireactor. d,e) Sampling dishes to collect fresh earthworm cast samples. f) Fresh earthworm casts were collected from each sampling dish with a sterile spatula (flame sterilized between samples). g) Vermicompost derived from sewage sludge after 3 months of vermicomposting.
